# Supplementary material for: The sequence flanking the N-terminus of the CLV3 peptide is critical for its cleavage and activity in stem cell regulation in Arabidopsis
Source: PubMed Central journal article supplement (PMC3878228; doi:10.1186/1471-2229-13-225), 2013-12-27
Supplement: 1471-2229-13-225-S1.pdf [file 1471-2229-13-225-S1.pdf]

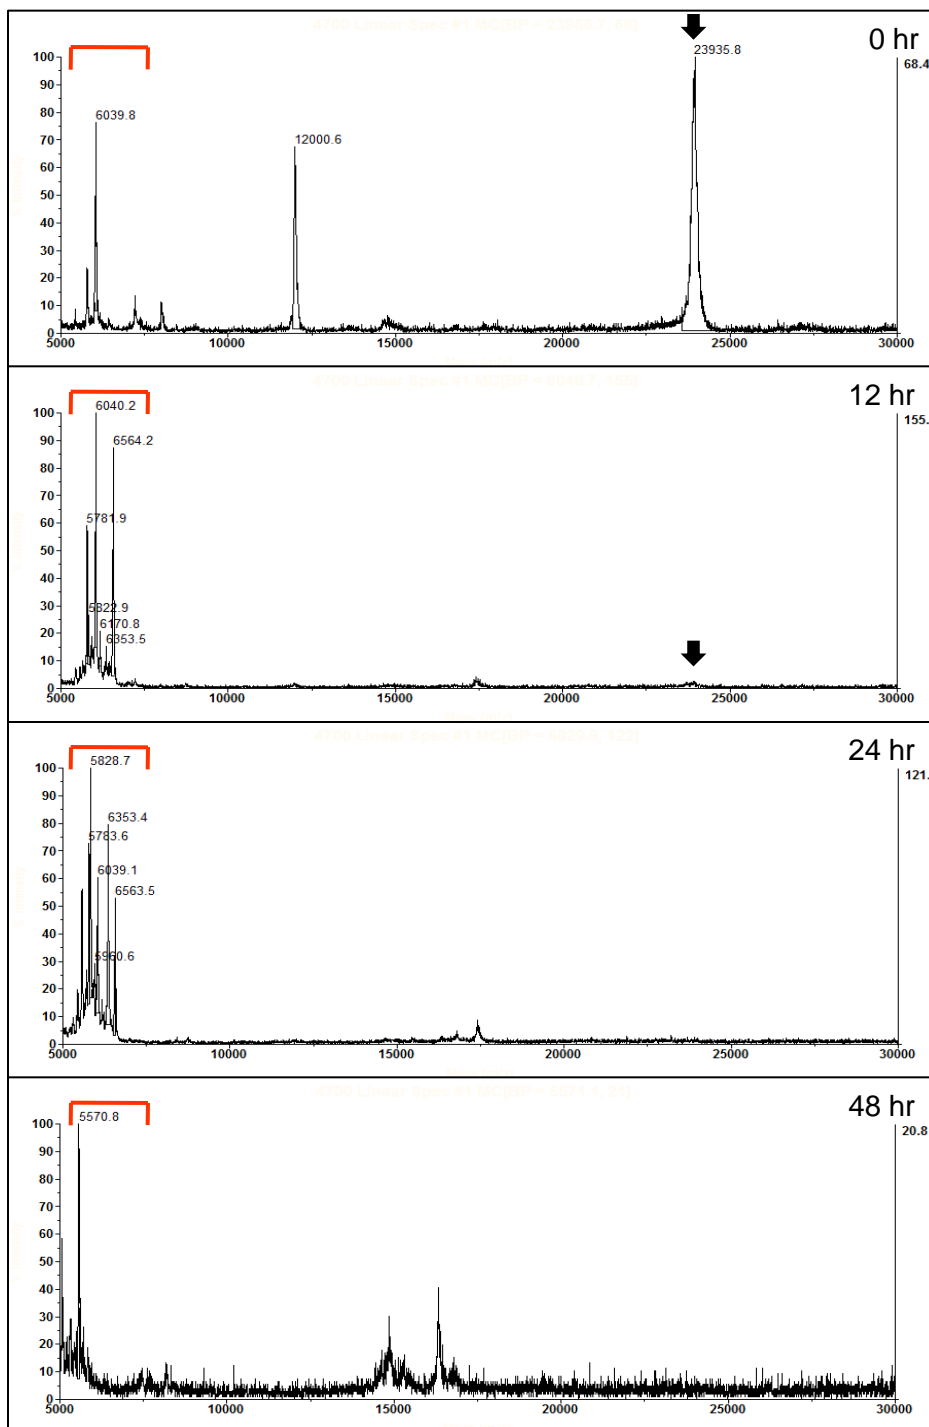

**Additional file 1. Cleavages of the TH-ProCLV3 fusion protein after co-cultivation with *Ler* seedlings for 0, 12, 24 and 48 hrs, as showed by MALDI-Tof MS analyses**

Arrows indicate the peak of TH-ProCLV3. Note the most abundant small peptides (marked by red brackets) were detected after the 24-hr inoculation.
