# Supplementary material for: The sequence flanking the N-terminus of the CLV3 peptide is critical for its cleavage and activity in stem cell regulation in Arabidopsis
Source: PubMed Central journal article supplement (PMC3878228; doi:10.1186/1471-2229-13-225), 2013-12-27
Supplement: 1471-2229-13-225-S2.pdf [file 1471-2229-13-225-S2.pdf]

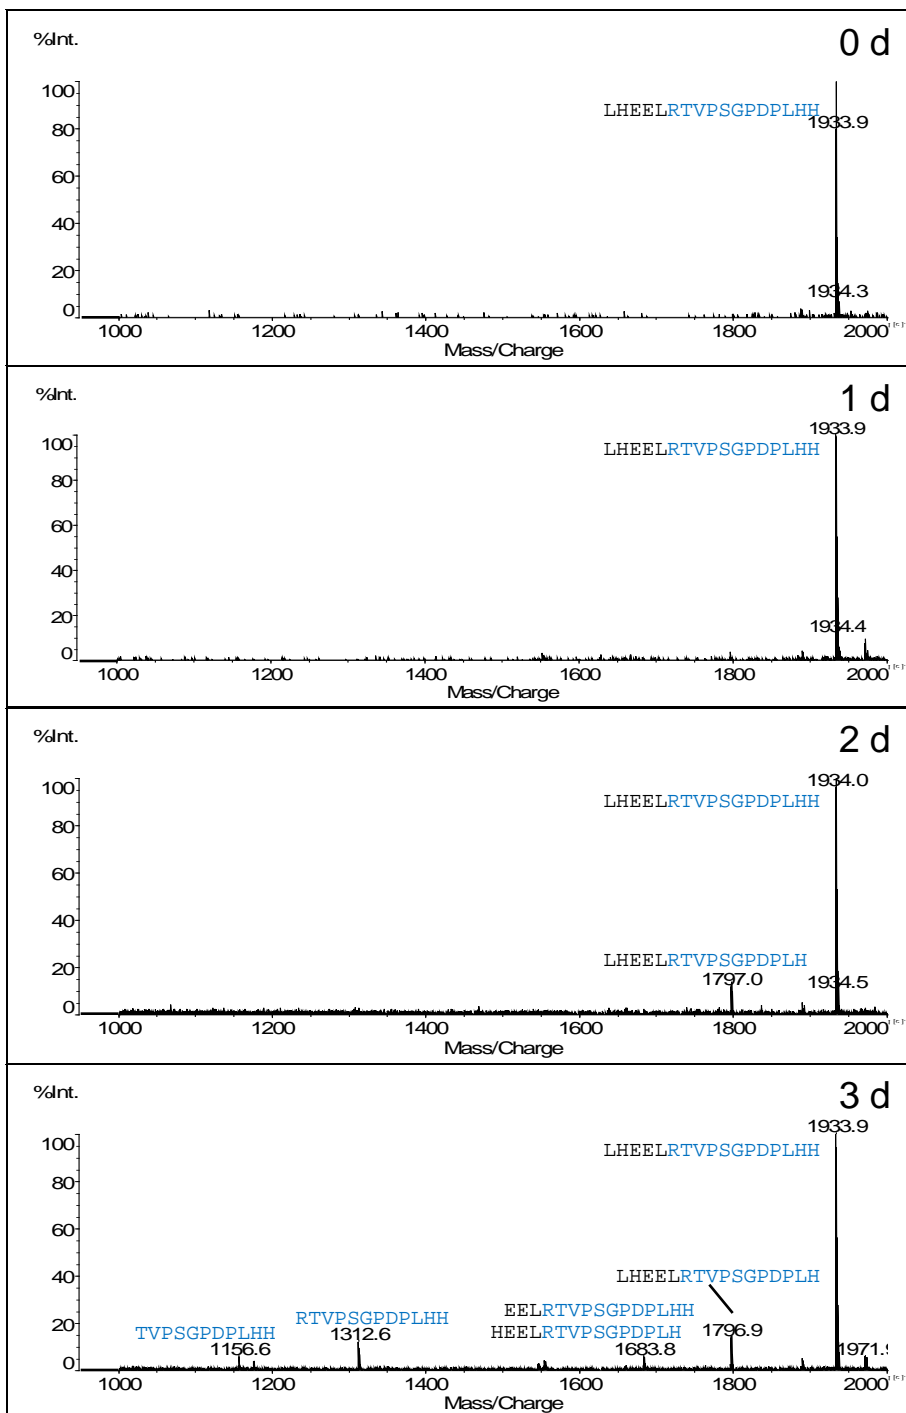

**Additional file 2. Cleavages of the LHEEL-CLV3p17 peptide after co-cultivation with *Ler* seedlings for 0, 1, 2 and 3 d, as showed by MALDI-Tof MS analyses**

Peptide sequences, defined based on their accurate masses, are showed near corresponding peaks. The core CLE motif of CLV3 is shown in blue.
