# Supplementary material for: The sequence flanking the N-terminus of the CLV3 peptide is critical for its cleavage and activity in stem cell regulation in Arabidopsis
Source: PubMed Central journal article supplement (PMC3878228; doi:10.1186/1471-2229-13-225), 2013-12-27
Supplement: 1471-2229-13-225-S5.pdf [file 1471-2229-13-225-S5.pdf]

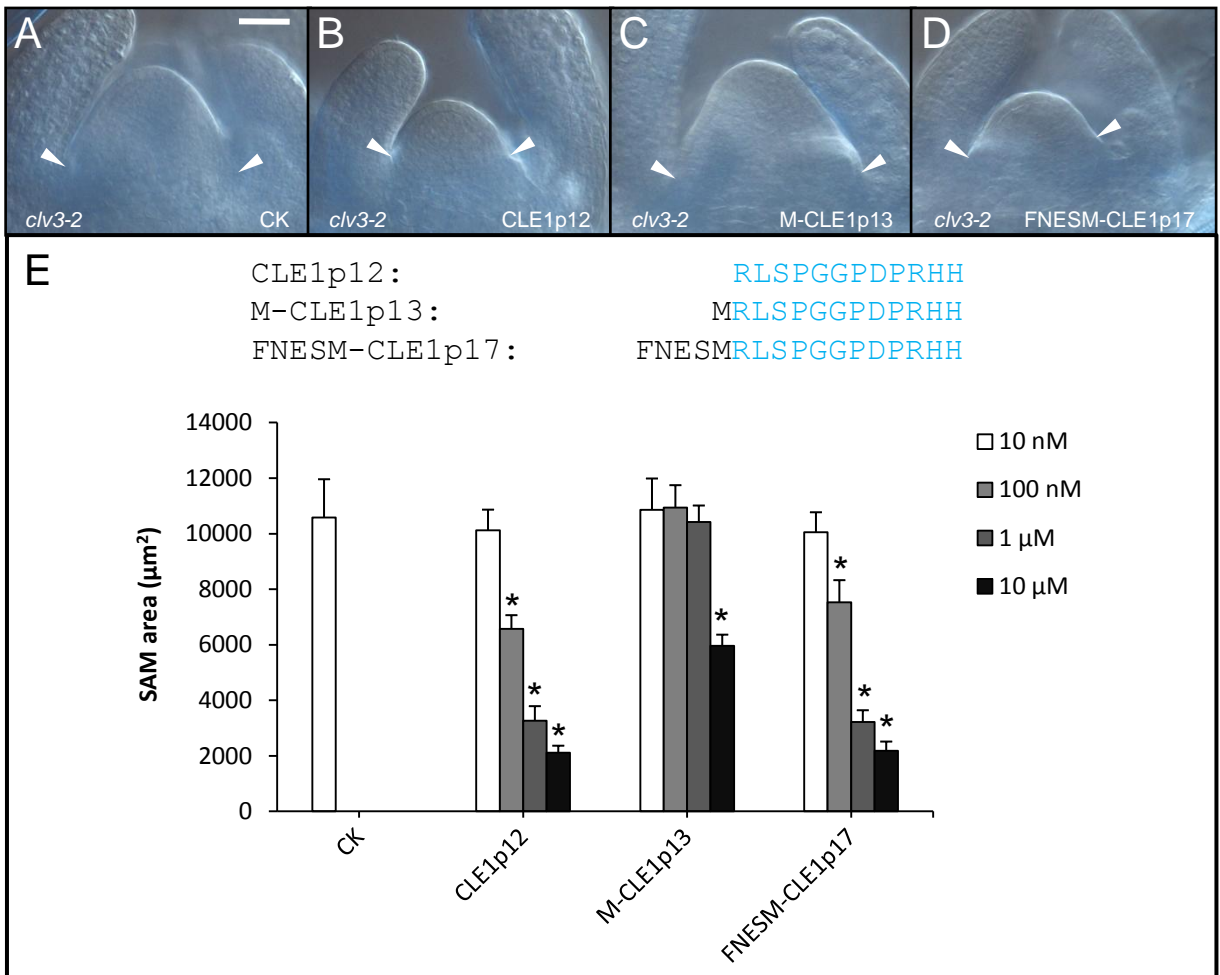

### Additional file 5. *In vitro* activity assay of CLE1 peptides with different N-terminal extensions

(A-D) SAMs of *clv3-2* after treatments with CLE1p12 (B), M-CLE1p13 (C) or FNESM-CLE1p17 (D), as compared to the control without peptide (A). The arrowheads indicate margins of the SAMs. The bar in A = 50 µm for A to D. (E) Average SAM areas of *clv3-2* seedlings (n = 16 for all treatments) after 8-d incubations in media containing CLE1 peptides with different N-terminal extensions (showed above). Error bar = ± SD. Average SAM areas with significant difference from the non-treated one ( $P < 0.01$  by Student's *t*-test) are marked with asterisks.
